# Supplementary material for: Elucidating the complete oxidation mechanism of betanidin in an aqueous solution
Source: Royal Society of Chemistry journal article supplement (doi:10.1039/d2cp05708e), 2023-01-01
Supplement: d2cp05708e1.xlsx [file d2cp05708e1.xlsx]

## Sheet: OxidationIII pH=0
B3LYP/6-31+G(d,p)/SMD multi explicit water molecules
		Gaq										Termodinamic constants
	Compound	au	kcal/mol		Reaction	pKa	E°ox (SHE)	E°ox (Ag/AgCl)
	4	-1599.58	-1.00375e+06									R	0.00198588
	42+.	-1599.39	-1.00363e+06		4 --> 42+. + e-		0.853838	0.656838				T	298.15
	43+	-1599.17	-1.0035e+06		42+.--> 43+ + e-		1.49957	1.30257				ΔG(aq)H+	-270.29
Since C6-OH	4OH6+.	-1598.96	-1.00337e+06		42+.--> 4OH6+. + H+	-4.38126						SHE	4.281
	4OH62+	-1598.76	-1.00324e+06		43+--> 4OH62+ + H+	-10.4678						F	23.0604
	4Q.	-1598.52	-1.00309e+06		4OH6+.--> 4OH62+ + e-		1.13967	0.942668				Ggas e	-0.867
	4Q	-1598.35	-1.00298e+06		4OH6+.--> 4Q. + H+	6.41944						1/2.303RT	0.733362
					4OH62+--> 4Q + H+	-7.09317						(atm->m/l)	1.89
					4Q.--> 4Q + e-		0.340654	0.143654				Ggas e/F	-0.037597
												SHE+G(e-)	4.3186
					4--> 4OH6+. + e- + H+		0.594769	0.397769				SHE to Ag/AgCl	0.197
					4OH6+.--> 4Q + e- + H+		0.720242	0.523242
					4--> 4Q + 2e- + 2H+		0.657506	0.460506
B3LYP/6-31+G(d,p)/SMD multi explicit water molecules
		Gaq
	Compound	au	kcal/mol		Reaction	pKa	E°ox (SHE)	E°ox (Ag/AgCl)
	4	-1599.58	-1.00375e+06
	42+.	-1599.39	-1.00363e+06		4 --> 42+. + e-		0.853838	0.656838
	43+	-1599.17	-1.0035e+06		42+.--> 43+ + e-		1.49957	1.30257
Since C5-OH	4OH5+.	-1598.96	-1.00336e+06		42+.--> 4OH5+. + H+	-1.79314
	4OH52+	-1598.76	-1.00324e+06		43+--> 4OH52+ + H+	-10.1498
	4Q.	-1598.52	-1.00309e+06		4OH5+.--> 4OH52+ + e-		1.00543	0.808434
	4Q	-1598.35	-1.00298e+06		4OH5+.--> 4Q. + H+	3.83132
	10	-1598.33	-1.00297e+06		4OH52+--> 4Q + H+	-7.41117
					4Q.--> 4Q + e-		0.340654	0.143654
					4OH52+--> 10 + H+	2.29428
					4--> 4OH5+. + e- + H+		0.747807	0.550807
					4OH5+.--> 4Q + e- + H+		0.567204	0.370204
					4OH5+.--> 10 + e- + H+		1.1411	0.944097
					4--> 4Q + 2e- + 2H+		0.657506	0.460506
					4--> 10 + 2e- + 2H+		0.944452	0.747452

## Sheet: OxidationIII pH=1.08
B3LYP/6-31+G(d,p)/SMD multi explicit water molecules
		Gaq										Termodinamic constants
	Compound	au	kcal/mol		Reaction	pKa	E°ox (SHE)	E°ox (Ag/AgCl)
	4	-1599.58	-1.00375e+06									R	0.00198588
	4C15	-1599.14	-1.00348e+06		4 --> 4C15 + H+	2.23169						T	298.15
	4C17	-1599.14	-1.00348e+06		4 --> 4C17 + H+	1.07891						ΔG(aq)H+	-270.29
	4C1715	-1598.7	-1.0032e+06		4C17--> 4C1715 + H+	3.14517						SHE	4.281
	4C1715OH6	-1598.25	-1.00292e+06		4C1715--> 4C1715OH6 + H+	10.6725						F	23.0604
	4C1715OH65	-1597.78	-1.00262e+06		4C1715OH6--> 4C1715OH65 + H+	18.3389
	4C17+.	-1598.95	-1.00336e+06		4C17 --> 4C17+. + e-		0.879498	0.682498				Ggas e	-0.867
	4C172+	-1598.74	-1.00322e+06		4C17+.--> 4C172+ + e-		1.45002	1.25302				1/2.303RT	0.733362
since C6-OH	4C17OH6.	-1598.53	-1.00309e+06		4C17+.--> 4C17. + H+	-3.70064						(atm->m/l)	1.89
	4C17OH6+	-1598.33	-1.00297e+06		4C172+--> 4C17OH6+ + H+	-10.8355						Ggas e/F	-0.037597
	4C17.-	-1598.09	-1.00281e+06		4C17OH6.--> 4C17OH6+ + e-		1.02813	0.831128				SHE+G(e-)	4.3186
	4C17Q	-1597.92	-1.00271e+06		4C17OH6.--> 4C17.- + H+	5.75676						SHE to Ag/AgCl	0.197
					4C17OH6+--> 4C17Q + H+	-7.17371
					4C17.---> 4C17Q + e-		0.263537	0.0665367
					4C17--> 4C17+. + e- + H+		0.660676	0.463676
					4C17+.--> 4C17Q + e- + H+		0.60394	0.40694
					4C17--> 4C17Q + 2e- + 2H+		0.632308	0.435308
B3LYP/6-31+G(d,p)/SMD multi explicit water molecules
		Gaq
	Compound	au	kcal/mol		Reaction	pKa	E°ox (SHE)	E°ox (Ag/AgCl)
	4C17	-1599.14	-1.00348e+06
	4C17+.	-1598.95	-1.00336e+06		4C17 --> 4C17+. + e-		0.879498	0.682498
	4C172+	-1598.74	-1.00322e+06		4C17+.--> 4C172+ + e-		1.45002	1.25302
Since C5-OH	4C17OH5.	-1598.52	-1.00309e+06		4C17+.--> 4C17OH5. + H+	-1.67349
	4C17OH6+	-1598.33	-1.00297e+06		4C172+--> 4C17OH5+ + H+	-11.1893
	4C17.-	-1598.09	-1.00281e+06		4C17OH5.--> 4C17OH5+ + e-		0.887335	0.690335
	4C17Q	-1597.92	-1.00271e+06		4C17OH5.--> 4C17.- + H+	3.72962
	10C17	-1597.89	-1.00269e+06		4C17OH5+--> 4C17Q + H+	-6.81982
					4C17.---> 4C17Q + e-		0.263537	0.0665367
					4C17OH5+--> 10C17 + H+	5.58465
					4C17--> 4C17OH5. + e- + H+		0.780543	0.583543
					4C17OH5.--> 4C17Q + e- + H+		0.484073	0.287073
					C17.--> 10C17Q + e- + H+		1.21756	1.02056
					C17--> C17Q + 2e- + 2H+		0.632308	0.435308
					4C17--> 10C17 + 2e- + 2H+		0.999052	0.802052

## Sheet: Oxidation III pH=3.15
B3LYP/6-31+G(d,p)/SMD multi explicit water molecules
		Gaq										Termodinamic constants
	Compound	au	kcal/mol		Reaction	pKa	E°ox (SHE)	E°ox (Ag/AgCl)
	4C1715	-1598.7	-1.0032e+06									R	0.00198588
	4C1715.	-1598.51	-1.00308e+06		4C1715 --> 4C1715. + e-		0.85928	0.66228				T	298.15
	4C1715+	-1598.3	-1.00295e+06		4C1715.--> 4C1715+ + e-		1.39328	1.19628				ΔG(aq)H+	-270.29
Since C6-OH	4C1715OH6.-	-1598.09	-1.00282e+06		4C1715.--> 4C1715OH6.- + H+	-2.9381						SHE	4.281
	4C17150	-1597.9	-1.00269e+06		4C1715+--> 4C17150 + H+	-9.8442						F	23.0604
	4C1715.2-	-1597.65	-1.00254e+06		4C1715OH6.---> 4C17150 + e-		0.984916	0.787916				Ggas e	-0.867
	4C1715Q	-1597.48	-1.00244e+06		4C1715OH6.---> 4C1715.2- + H+	6.27172						1/2.303RT	0.733362
					4C17150--> 4C1715Q + H+	-8.07108						(atm->m/l)	1.89
					4C1715.2---> 4C1715Q + e-		0.136812	-0.0601877				Ggas e/F	-0.037597
												SHE+G(e-)	4.3186
					4C1715--> 4C1715OH6.- + e- + H+		0.685547	0.488547				SHE to Ag/AgCl	0.197
					4C1715OH6.---> 4C1715Q + e- + H+		0.507665	0.310665
					4C1715--> 4C1715Q + 2e- + 2H+		0.596606	0.399606
B3LYP/6-31+G(d,p)/SMD multi explicit water molecules
		Gaq
	Compound	au	kcal/mol		Reaction	pKa	E°ox (SHE)	E°ox (Ag/AgCl)
	4C1715	-1598.7	-1.0032e+06
	4C1715.	-1598.51	-1.00308e+06		4C1715 --> 4C1715. + e-		0.85928	0.66228
	4C1715+	-1598.3	-1.00295e+06		4C1715.--> 4C1715+ + e-		1.39328	1.19628
Since C5-OH	4C1715OH5.-	-1598.09	-1.00281e+06		4C1715.--> 4C1715OH5.- + H+	-1.18753
	4C17150	-1597.9	-1.0027e+06		4C1715+--> 4C17150 + H+	-10.7222
	4C1715.2-	-1597.65	-1.00254e+06		4C1715OH5.---> 4C17150 + e-		0.829483	0.632483
	4C1715Q	-1597.48	-1.00244e+06		4C1715OH5.---> 4C1715.2- + H+	4.52115
	10C1715	-1597.45	-1.00241e+06		4C17150--> 4C1715Q + H+	-7.19304
					4C17150--> 10C1715 + H+	8.40977
					4C1715.2---> 4C1715Q + e-		0.136812	-0.0601877
					4C1715--> 4C1715OH5.- + e- + H+		0.78906	0.59206
					4C1715OH5.---> 4C1715Q + e- + H+		0.404152	0.207152
					4C1715OH5.---> 10C1715 + e- + H+		1.32676	1.12976
					4C1715 --> 4C1715Q + 2e- + 2H+		0.596606	0.399606
					4C17C15 --> 10C17C15 + 2e-		1.05791	0.860911

## Sheet: Oxidation III pH=10.7
B3LYP/6-31+G(d,p)/SMD multi explicit water molecules
		Gaq										Termodinamic constants
	Compound	au	kcal/mol		Reaction	pKa	E°ox (SHE)	E°ox (Ag/AgCl)
	4C1715OH6	-1598.25	-1.00292e+06									R	0.00198588
	4C17215.-	-1598.09	-1.00282e+06		4C1715OH6 --> 4C1715.- + e-		0.05447	-0.14253				T	298.15
	4C17215.	-1597.9	-1.00269e+06		4C1715.---> 4C1715. + e-		0.984916	0.787916				ΔG(aq)H+	-270.29
Since C6-OH	4C1715OH6.2-	-1597.65	-1.00254e+06		4C1715.---> C17215.2- + H+	6.27172						SHE	4.281
	4C1715Q	-1597.48	-1.00244e+06		4C17152.--> C1715Q + H+	-8.07108						F	23.0604
												Ggas e	-0.867
												1/2.303RT	0.733362
												(atm->m/l)	1.89
					4C1715.2---> 4C1715Q + e-		0.136812	-0.0601877				Ggas e/F	-0.037597
												SHE+G(e-)	4.3186
					4C1715OH6--> C1715.2- + e- + H+		0.425323	0.228323				SHE to Ag/AgCl	0.197
					4C1715OH6--> C17215Q + 2e- + H+		0.281068	0.0840675
