# Supplementary material for: Elucidating the complete oxidation mechanism of betanidin in an aqueous solution
Source: Royal Society of Chemistry journal article supplement (doi:10.1039/d2cp05708e), 2023-01-01
Supplement: d2cp05708e2.xlsx [file d2cp05708e2.xlsx]

## Sheet: OxidationIII pH=0
B3LYP/6-31+G(d,p)/SMD multi explicit water molecules
		Gaq										Termodinamic constants
	Compound	au	kcal/mol		Reaction	pKa	E°ox (SHE)	E°ox (Ag/AgCl)
	6 (2)	-1334.56	-837451									R	0.00198588
	62+.	-1334.37	-837332		6 --> 62+. + e-		0.873321	0.676321				T	298.15
	63+	-1334.16	-837198		62+.--> 63+ + e-		1.48204	1.28504				ΔG(aq)H+	-270.29
DESDE C6-OH	6OH6+.	-1333.95	-837067		62+.--> 6+. + H+	-4.00345						SHE	4.281
	6OH62+	-1333.76	-836946		63+--> 62+ + H+	-13.2377						F	23.0604
	6Q.	-1333.51	-836788		6OH6+.--> 6OH62+ + e-		0.936017	0.739017				Ggas e	-0.867
	6Q	-1333.34	-836682		6OH6+.--> 6Q. + H+	6.23536						1/2.303RT	0.733362
					62+--> 6Q + H+	-4.88287						(atm->m/l)	1.89
					6Q.--> 6Q + e-		0.278585	0.0815847				Ggas e/F	-0.037597
												SHE+G(e-)	4.3186
					6--> 6OH6+. + e- + H+		0.636594	0.439594				SHE to Ag/AgCl	0.197
					6OH6+.--> 6Q + e- + H+		0.647288	0.450288
					6--> 6Q + 2e- + 2H+		0.641941	0.444941
B3LYP/6-31+G(d,p)/SMD multi explicit water molecules
		Gaq
	Compound	au	kcal/mol		Reaction	pKa	E°ox (SHE)	E°ox (Ag/AgCl)
	6	-1334.56	-837451
	62+.	-1334.37	-837332		6 --> 62+. + e-		0.873321	0.676321
	63+	-1334.16	-837198		62+.--> 63+ + e-		1.48204	1.28504
DESDE C5-OH	6OH5+.	-1333.95	-837063		62+.--> 6+. + H+	-1.50138
	6OH52+	-1333.75	-836944		63+--> 62+ + H+	-11.8907
	6Q.	-1333.51	-836788		6OH5+.--> 6OH52+ + e-		0.867716	0.670716
	6Q	-1333.34	-836682		6OH5+.--> 6Q. + H+	3.7333
	7	-1333.31	-836665		6OH52+--> 6Q + H+	-6.22985
					6Q.--> 6Q + e-		0.278585	0.0815847
					6OH52+--> 7 + H+	5.92105
					6--> 6OH5+. + e- + H+		0.784543	0.587543
					6OH5+.--> 6Q + e- + H+		0.499338	0.302338
					6--> 6Q + 2e- + 2H+		0.641941	0.444941
					6OH5+.--> 7 + e- + H+		1.21783	1.02083
					6--> 7 + 2e- + 2H+		1.00119	0.804188

## Sheet: OxidationIII pH=4
B3LYP/6-31+G(d,p)/SMD multi explicit water molecules
		Gaq										Termodinamic constants
	Compound	au	kcal/mol		Reaction	pKa	E°ox (SHE)	E°ox (Ag/AgCl)
	6	-1334.56	-837451		6--> 6C15 + H+	3.97214						R	0.00198588
	6C15	-1334.12	-837176									T	298.15
	6C15+.	-1333.94	-837057		6C15 --> 6C15+. + e-		0.813483	0.616483				ΔG(aq)H+	-270.29
	6C152+	-1333.72	-836924		6C15+.--> 6C15+ + e-		1.46057	1.26357				SHE	4.281
Since C6-OH	6C15OH6.	-1333.51	-836792		6C15+.--> 6C15OH6. + H+	-3.48205						F	23.0604
	6C15OH6+	-1333.32	-836668		6C152+--> 6C15OH6+ + H+	-10.7462						Ggas e	-0.867
	6C15Q.-	-1333.07	-836511		6C15OH6.--> 6C15OH6+ + e-		1.03104	0.83404				1/2.303RT	0.733362
	6C15Q	-1332.9	-836407		6C15OH6.--> 6C15.- + H+	7.54001						(atm->m/l)	1.89
					6C15OH6+--> 6C15Q + H+	-6.35319						Ggas e/F	-0.037597
					6C15Q.---> 6C15Q + e-		0.209522	0.0125217				SHE+G(e-)	4.3186
												SHE to Ag/AgCl	0.197
					6C15--> 6C15+. + e- + H+		0.607586	0.410586
					6C15+.--> 6C15Q + e- + H+		0.65537	0.45837
					6C15--> 6C15Q + 2e- + 2H+		0.631478	0.434478
B3LYP/6-31+G(d,p)/SMD multi explicit water molecules
		Gaq
	Compound	au	kcal/mol		Reaction	pKa	E°ox (SHE)	E°ox (Ag/AgCl)
	6C15	-1334.12	-837176
	6C15+.	-1333.94	-837057		6C15 --> 6C15+. + e-		0.813483	0.616483
	6C152+	-1333.72	-836924		6C15+.--> 6C15OH5+ + e-		1.46057	1.26357
Since C5-OH	6C15OH5.	-1333.51	-836788		6C15+.--> 6C15OH5. + H+	-1.01864
	6C15OH5+	-1333.32	-836670		6C152+--> 6C15OH5+ + H+	-11.7158
	6C15Q.-	-1333.07	-836511		6C15OH5.--> 6C15OH5+ + e-		0.828041	0.631041
	6C15Q	-1332.9	-836407		6C15OH5.--> 6C15.- + H+	5.0766
	7C15	-1332.87	-836388		6C15OH5+--> 6C15Q + H+	-5.38356
					6C15Q.---> 6C15Q + e-		0.209522	0.0125217
					6C15OH5+--> 7C15 + H+	8.50181
					6C15--> 6C15+. + e- + H+		0.75325	0.55625
					6C15+.--> 6C15Q + e- + H+		0.509706	0.312706
					6C15--> 6C15Q + 2e- + 2H+		0.631478	0.434478
					6OH5+.--> 7C15 + e- + H+		1.33076	1.13376
					6--> 7C15 + 2e- + 2H+		1.04201	0.845006

## Sheet: Oxidation III pH=9.44
B3LYP/6-31+G(d,p)/SMD multi explicit water molecules
		Gaq										Termodinamic constants
	Compound	au	kcal/mol		Reaction	pKa	E°ox (SHE)	E°ox (Ag/AgCl)
	6C15	-1334.12	-837176		6C15--> 6C15OH6 + H+	9.45809						R	0.00198588
	6C15OH6	-1333.67	-836892									T	298.15
	6C15OH6.	-1333.51	-836792		6C15OH6 --> 6C15OH6. + e-		0.0395308	-0.157469				ΔG(aq)H+	-270.29
	6C15OH6+	-1333.32	-836668		6C15OH6.--> 6C15OH6+ + e-		1.04045	0.843455				SHE	4.281
DESDE C6-OH	6C15OH6Q.-	-1333.07	-836511		6C15OH6.--> 6C15OH6Q.- + H+	7.68865						F	23.0604
	6C15OH6Q	-1332.9	-836407		6C15OH6+--> 6C15OH6Q + H+	-6.36377						Ggas e	-0.867
												1/2.303RT	0.733362
												(atm->m/l)	1.89
												Ggas e/F	-0.037597
					6C15OH6.---> 6C15OH6Q + e-		0.209522	0.0125217				SHE+G(e-)	4.3186
												SHE to Ag/AgCl	0.197
					6C15OH6--> 6C15OH6.- + e- + H+		0.494168	0.297168
					6C15OH6--> 6C15OH6Q + 2e- + H+		0.351845	0.154845
