# Supplementary material for: Elucidating the complete oxidation mechanism of betanidin in an aqueous solution
Source: Royal Society of Chemistry journal article supplement (doi:10.1039/d2cp05708e), 2023-01-01
Supplement: d2cp05708e3.xlsx [file d2cp05708e3.xlsx]

## Sheet: OxidationIII pH=0
B3LYP/6-31+G(d,p)/SMD multi explicit water molecules
		Gaq										Termodinamic constants
	Compound	au	kcal/mol		Reaction	pKa	E°ox (SHE)	E°ox (Ag/AgCl)
	9	-1332.96	-836442									R	0.00198588
	9OH6.	-1332.34	-836055									T	298.15
	9SQ6	-1332.15	-835936									ΔG(aq)H+	-270.29
Since C6-OH	9Q.-	-1331.89	-835776									SHE	4.281
	9Q	-1331.73	-835673									F	23.0604
	9SQ6	-1332.15	-835936		9OH6.--> 9OH6+ + e-		0.845647	0.648647				Ggas e	-0.867
					9OH6.--> 9Q.- + H+	6.33845						1/2.303RT	0.733362
					9+--> 9Q + H+	-5.33754						(atm->m/l)	1.89
					9Q.---> 9Q + e-		0.155235	-0.0417655				Ggas e/F	-0.037597
												SHE+G(e-)	4.3186
					9--> 9OH6. + e- + H+		0.748569	0.551569				SHE to Ag/AgCl	0.197
					9OH6.--> 9Q + e- + H+		0.530033	0.333033
					9--> 9Q + 2e- + 2H+		0.639301	0.442301
					9--> 9SQ6 + 2e- + H+		0.797108	0.600108
					9OH6.--> 9SQ6 + e-		0.845647	0.648647
B3LYP/6-31+G(d,p)/SMD multi explicit water molecules
		Gaq
	Compound	au	kcal/mol		Reaction	pKa	E°ox (SHE)	E°ox (Ag/AgCl)
	9	-1332.96	-836442
	9OH5.	-1332.34	-836054
	9SQ5	-1332.15	-835935
Since C5-OH	9Q.-	-1331.89	-835776
	9Q	-1331.73	-835673
					9OH5.--> 9SQ5 + e-		0.86192	0.66492
					9OH5.--> 9Q.- + H+	5.40472
					9SQ5--> 9Q + H+	-6.54647
					9Q.---> 9Q + e-		0.155235	-0.0417655
					9--> 9OH5. + e- + H+		0.803782	0.606782
					9OH5.--> 9Q + e- + H+		0.474821	0.277821
					9--> 9Q + 2e- + 2H+		0.639301	0.442301
					9--> 9SQ5 + 2e- + H+		0.832851	0.635851

## Sheet: OxidationIII pH=6.65
B3LYP/6-31+G(d,p)/SMD multi explicit water molecules
		Gaq										Termodinamic constants
	Compound	au	kcal/mol		Reaction	pKa	E°ox (SHE)	E°ox (Ag/AgCl)
	9	-1332.96	-836442		9--> 9C15 + H+	6.64724						R	0.00198588
	9C15	-1332.51	-836163									T	298.15
	9C15OH6.-	-1331.9	-835779									ΔG(aq)H+	-270.29
	9SQ6C15	-1331.71	-835660									SHE	4.281
since C6-OH	9C15OH6Q.2-	-1331.45	-835500									F	23.0604
	9C15Q	-1331.29	-835397									Ggas e	-0.867
												1/2.303RT	0.733362
					9C15OH6.---> 9C15OH6.2- + H+	6.88285						(atm->m/l)	1.89
					9Q--> 9C15SQ5 + H+	-5.80878						Ggas e/F	-0.037597
					9C15Q.2---> 9C15Q + e-		0.114009	-0.0829911				SHE+G(e-)	4.3186
												SHE to Ag/AgCl	0.197
					9C15--> 9C15.- + e- + H+		0.605355	0.408355
					9C15.---> 9C15Q + e- + H+		0.520999	0.323999
					9C15--> 9C15Q + 2e- + 2H+		0.563177	0.366177
					9C15.---> 9C15SQ6 + e-		0.864478	0.667478
B3LYP/6-31+G(d,p)/SMD multi explicit water molecules
		Gaq
	Compound	au	kcal/mol		Reaction	pKa	E°ox (SHE)	E°ox (Ag/AgCl)
	9C15	-1332.51	-836163
	9C15OH5.	-1331.9	-835778
	9SQ5C15	-1331.71	-835661
Since C5-OH	9C15OH5Q.2-	-1331.45	-835500
	9C15Q	-1331.29	-835397
					9C15.--> 9C15.2- + H+	6.00297
					9Q--> 9C15SQ5 + H+	-4.5612
					9C15Q.2---> 9C15Q + e-		0.114009	-0.0829911
					9C15SQ--> 9C15Q + H+	-4.5612
					9C15--> 9C15.- + e- + H+		0.657383	0.460383
					9C15.--> 9C15Q + e- + H+		0.46897	0.27197
					9C15-->9C15Q + 2e- + 2H+		0.563177	0.366177
					9OH5.---> 9C15SQ5 + e-		0.738678	0.541678
					9--> 9C15SQ5 + 2e- + H+		0.698031	0.501031

## Sheet: Oxidation III pH=9.44
B3LYP/6-31+G(d,p)/SMD multi explicit water molecules
		Gaq										Termodinamic constants
	Compound	au	kcal/mol		Reaction	pKa	E°ox (SHE)	E°ox (Ag/AgCl)
	9C15OH5	-1332.05	-835876		9C15--> 9C15OH5 + H+	12.4641
	9C15OH6	-1332.06	-835880		9C15--> 9C15OH6 + H+	9.43738						R	0.00198588
	9SQ6.-	-1331.9	-835777									T	298.15
	9SQ6	-1331.71	-835660		9C15OH6 --> 9C15OH6.- + e-		0.125193	-0.0718071				ΔG(aq)H+	-270.29
					9C15OH6.---> 9C15SQ6 + e-		0.786598	0.589598				SHE	4.281
Since C6-OH	9C15OH6Q.2-	-1331.45	-835500		9C15OH6.---> 9C15OH6Q.2- + H+	5.56578						F	23.0604
	9C15Q	-1331.29	-835397		9SQ6--> 9C15Q + H+	-5.80878						Ggas e	-0.867
												1/2.303RT	0.733362
	9C15	-1332.51	-836163									(atm->m/l)	1.89
												Ggas e/F	-0.037597
					9C15OH6.2---> 9C15Q + e-		0.114009	-0.0829911				SHE+G(e-)	4.3186
												SHE to Ag/AgCl	0.197
					9C15OH6--> 9C15SQ6 + 2e-		0.455895	0.258895
					9C15OH5--> 9C15Q + 2e- + H+		0.194671	-0.00232928
					9C15OH6--> 9C15Q + 2e- + H+		0.284156	0.0871561
