# Supplementary material for: Elucidating the complete oxidation mechanism of betanidin in an aqueous solution
Source: Royal Society of Chemistry journal article supplement (doi:10.1039/d2cp05708e), 2023-01-01
Supplement: d2cp05708e4.xlsx [file d2cp05708e4.xlsx]

## Sheet: decarboxilation pH=0
B3LYP/6-31+G(d,p)/SMD
		Gaq		Haq
	Compound	au	kcal/mol	au	kcal/mol		Reaction	DGaq	DHaq	TSDGaq	TSDHaq	pKa
	5	-1405.97	-882257	-1405.88	-882205												ΔG(aq)H+	-270.29
	4	-1217.4	-763932	-1217.33	-763884		5 --> 4 + CO2	-21.1295	-10.2228	11.1985	11.2964						1/2.303RT	0.733362
	4'	-1217.39	-763925	-1217.32	-763877		5 --> 4' + CO2	-13.9878	-2.83258								ΔH(aq)H+	-246.72
	4''	-1217.39	-763925	-1217.32	-763878		5 --> 4'' + CO2	-14.1416	-3.77698
	CO2	-188.597	-118346	-188.572	-118331		5 --> 5C2 + H+	0.259466	23.9292			0.190283
	5C2	-1405.54	-881987	-1405.45	-881934		5 --> 5C15 + H+	3.43843	26.4198			2.52161
	4TS	-1405.52	-881976	-1405.43	-881923		5 --> 5C17 + H+	0.84807	23.9236			0.621943
	5C15	-1405.53	-881984	-1405.45	-881932		5C2 + H+ --> 4 + CO2	-21.389	-34.152
	5C15HNTS	-1405.51	-881974	-1405.43	-881923		5C2postTS + H+ --> 4					9.55243
	5C15HN	-1405.52	-881978	-1405.44	-881926
	5C17	-1405.53	-881986	-1405.45	-881934
	5C17HNTS	-1405.52	-881975	-1405.43	-881922
	5C17HN	-1405.52	-881979	-1405.44	-881927
	5C2postTS	-1216.95	-763649	-1216.88	-763601
	5C17CO2-H anti	-1405.96	-882252	-1405.88	-882201
	5C17CO2-H rot	-1405.95	-882247	-1405.87	-882199
	5C17HantiTS	-1405.9	-882217	-1405.82	-882166
	5C15CO2-H anti	-1405.96	-882255	-1405.88	-882203
	5C15CO2-H rot	-1405.96	-882252	-1405.88	-882200
	5C15HantiTS	-1405.93	-882235	-1405.85	-882183		5 --> C17CO2-H rot	5.08408	3.35843
	5C15HantiTSfreeze	-1405.9	-882217	-1405.82	-882168		5CO2-Hanti --> 5CO2-Hrot	5.0822	2.9311
							5CO2-Hrot --> 4'' + CO2	-24.3078	-10.0665	29.845	32.8112
							5 --> C15CO2-H rot	1.89947	2.04694
							5CO2-Hanti --> 5CO2-Hrot	3.3873	2.76167
							5CO2-Hrot --> 4' + CO2	-19.2746	-7.64118	17.3726	16.6064
										35.2397	31.9929
	6	-1028.83	-645600	-1028.76	-645557		4 --> 6 + CO2	-14.3806	-3.19465
	6'	-1028.82	-645596	-1028.75	-645553		4 --> C15CO2-H anti	1.218	1.75201
	4C15	-1217.4	-763931	-1217.32	-763883		4CO2-Hanti --> 4CO2-Hrot	3.189	2.25652
	4C15Hrot	-1217.4	-763928	-1217.32	-763880		4CO2-Hrot --> 6' + CO2	-14.2169	-3.05221	32.0883	31.0115
	4C15TS	-1217.35	-763896	-1217.27	-763849		4 --> 6' + CO2	-9.80986	0.956324
	4C17anti	-1217.4	-763928	-1217.32	-763881		4 --> C17CO2-H anti	4.43084	3.86797
	4C17Hrot	-1217.39	-763925	-1217.32	-763878		4CO2C17-Hanti --> 4c17CO2-Hrot	2.79744	2.52698
	4C17TS	-1217.34	-763894	-1217.27	-763846		4C17CO2-Hrot --> 6 + CO2	-14.3806	-3.19465	30.8226	31.5606
B3LYP/6-31+G(d,p)/SMD explicit water molecules
		Gaq		Haq
	Compound	au	kcal/mol	au	kcal/mol		Reaction	DGaq	DHaq	pKa
	5	-1864.58	-1.17004e+06	-1864.45	-1.16996e+06
	4	-1599.58	-1.00375e+06	-1599.46	-1.00368e+06		5 --> 4 + CO2	-23.7374	-6.77961
	4'	-1599.57	-1.00374e+06	-1599.45	-1.00367e+06		5 --> 4' + CO2	-17.5427	0.296184
	4''	-1599.57	-1.00374e+06	-1599.45	-1.00367e+06		5 --> 4'' + CO2	-18.1331	-0.32756
	CO2	-188.597	-118346	-188.572	-118331		5 --> 5C2 + H+	3.86012	25.7522
	5C2	-1864.14	-1.16977e+06	-1864.01	-1.16969e+06		4 --> 6 + CO2+ H2O	-19.2024	0.773719
	H2O	-76.4454	-47970.2	-76.4233	-47956.3		4 --> 6' + CO2+ H2O	-21.5807	1.65161
	6	-1334.56	-837451	-1334.47	-837392
	6'	-1334.57	-837454	-1334.47	-837391
	4C17	-1599.14	-1.00348e+06
	4C15	-1599.14	-1.00348e+06
