# Supplementary material for: Elucidating the complete oxidation mechanism of betanidin in an aqueous solution
Source: Royal Society of Chemistry journal article supplement (doi:10.1039/d2cp05708e), 2023-01-01
Supplement: d2cp05708e5.pdf [file d2cp05708e5.pdf]

**ELUCIDATING THE COMPLETE OXIDATION MECHANISM OF BETANIDIN  
IN AN AQUEOUS SOLUTION**

Edgardo Maximiliano Gavilán-Arriazu<sup>1</sup> and Sergio A. Rodríguez<sup>2\*</sup>

*<sup>1</sup> Facultad de Matemática, Astronomía y Física, IFEG-CONICET, Universidad Nacional de Córdoba, Córdoba, X5000, Argentina.*

*<sup>2</sup> CONICET, Instituto de Ciencias Químicas, FAYA, UNSE, Av. Belgrano Sur 1912, Santiago del Estero (4200), Argentina. Corresponding author: drsergiorod@gmail.com*

Submitted to:

***PCCP***

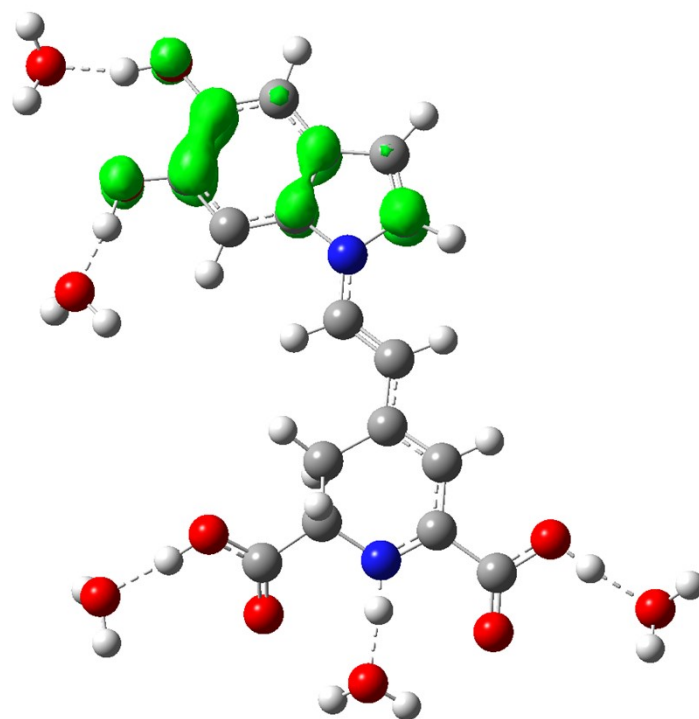

**Figure S1.** Spin density of  $4^{2+}$ . (Isovalue=0.02, density=0.08).
